# Supplementary material for: Environmental impact on the temporal production of chasmogamous and cleistogamous flowers in the mixed breeding system of Viola pubescens
Source: PubMed Central journal article supplement (PMC7065761; doi:10.1371/journal.pone.0229726), 2020-03-11
Supplement: pone.0229726.s003.pdf [file pone.0229726.s003.pdf]

|                   | <b>P(chasmogamous bud)</b> | <b>P(cleistogamous bud)</b> | <b>Bud type present</b> |
|-------------------|----------------------------|-----------------------------|-------------------------|
| <b>Dates 2016</b> |                            |                             |                         |
| March 29          | 100%                       | 1%                          | chasmogamous            |
| April 5           | 99%                        | 2%                          | chasmogamous            |
| April 13          | 95%                        | 5%                          | chasmogamous            |
| April 18          | 51%                        | 15%                         | chasmogamous            |
| April 27          | 38%                        | 40%                         | chasmogamous            |
| -----             |                            |                             |                         |
| May 4             | 7%                         | 70%                         | cleistogamous           |
| May 11            | 1%                         | 81%                         | cleistogamous           |
| May 19            | 0.88%                      | 82%                         | cleistogamous           |
| May 31            | 0.07%                      | 94%                         | cleistogamous           |
| June 16           | 0.02%                      | 96%                         | cleistogamous           |
| June 30           | 0.04%                      | 96%                         | cleistogamous           |
| <b>Dates 2017</b> |                            |                             |                         |
| March 29          | 100%                       | 2%                          | chasmogamous            |
| April 8           | 99%                        | 2%                          | chasmogamous            |
| April 12          | 92%                        | 12%                         | chasmogamous            |
| -----             |                            |                             |                         |
| April 18          | 50%                        | 42%                         | cleistogamous           |
| April 26          | 10%                        | 79%                         | cleistogamous           |
| May 8             | 7%                         | 77%                         | cleistogamous           |
| May 23            | 0.33%                      | 93%                         | cleistogamous           |
