# Supplementary material for: Environmental impact on the temporal production of chasmogamous and cleistogamous flowers in the mixed breeding system of Viola pubescens
Source: PubMed Central journal article supplement (PMC7065761; doi:10.1371/journal.pone.0229726), 2020-03-11
Supplement: pone.0229726.s004.pdf [file pone.0229726.s004.pdf]

| <b>Comparison</b>             | <b>ANOVA p-value</b> |
|-------------------------------|----------------------|
| <b>Bud Counts</b>             |                      |
| Year                          | 0.046                |
| Date                          | 0.060                |
| Bud type                      | 0.107                |
| Plot                          | 2.79e-8              |
| Year:Date                     | 0.854                |
| Year:Bud type                 | 0.531                |
| Year:Plot                     | 0.838                |
| Date:Bud type                 | 1.21e-10             |
| Date:Plot                     | 0.980                |
| Bud type:Plot                 | 0.914                |
| <b>Average Light Quantity</b> |                      |
| Year                          | 0.002                |
| Date                          | <2.2e-16             |
| Plot                          | 0.008                |
| Year:Date                     | 0.001                |
| Year:Plot                     | 0.005                |
| Date:Plot                     | 0.156                |
| <b>*Photoperiod</b>           |                      |
| Year                          | 0.22                 |
| <b>Mean Temperature</b>       |                      |
| Year                          | 0.182                |
| Date                          | 3.31e-7              |
| Plot                          | 0.026                |
| Year:Date                     | 0.094                |
| Year:Plot                     | 0.579                |
| Date:Plot                     | 0.482                |
| <b>Percent Soil Moisture</b>  |                      |
| Year                          | 0.080                |
| Date                          | 5.31e-10             |
| Plot                          | <2.2e-16             |
| Year:Date                     | 0.214                |
| Year:Plot                     | 0.047                |
| Date:Plot                     | 0.002                |

\*Photoperiod sample sizes were too small to meet ANOVA assumptions, and a Kruskal-Wallis test with a significance level of  $\alpha = 0.05$  was used instead.
