# Supplementary material for: Environmental impact on the temporal production of chasmogamous and cleistogamous flowers in the mixed breeding system of Viola pubescens
Source: PubMed Central journal article supplement (PMC7065761; doi:10.1371/journal.pone.0229726), 2020-03-11
Supplement: pone.0229726.s005.pdf [file pone.0229726.s005.pdf]

---

**Light quantity**

---

**Date 2016**

|          | March 29 | April 5 | April 13 | April 18      | April 27 | May 4 | May 11 | May 19 | May 31 |
|----------|----------|---------|----------|---------------|----------|-------|--------|--------|--------|
| April 5  | 1.00     | -       | -        | -             | -        | -     | -      | -      | -      |
| April 13 | 1.00     | 1.00    | -        | -             | -        | -     | -      | -      | -      |
| April 18 | 1.00     | 1.00    | 1.00     | -             | -        | -     | -      | -      | -      |
| April 27 | 1.3e-6   | 4.7e-5  | 8.9e-5   | 6.8e-6        | -        | -     | -      | -      | -      |
| May 4    | 3.5e-10  | 1.8e-8  | 3.7e-8   | <b>2.1e-9</b> | 1.00     | -     | -      | -      | -      |
| May 11   | 6.6e-12  | 3.6e-10 | 7.5e-10  | 4.1e-11       | 0.47     | 1.00  | -      | -      | -      |
| May 19   | 3.9e-12  | 2.2e-10 | 4.5e-10  | 2.5e-11       | 0.35     | 1.00  | 1.00   | -      | -      |
| May 31   | 4.8e-12  | 2.6e-10 | 5.6e-10  | 3.0e-11       | 0.39     | 1.00  | 1.00   | 1.00   | -      |
| June 30  | 1.3e-12  | 7.0e-11 | 1.5e-10  | 8.0e-11       | 0.18     | 1.00  | 1.00   | 1.00   | 1.00   |

**Date 2017**

|          | March 29 | April 8       | April 12 | April 18 | April 26 | May 8 |
|----------|----------|---------------|----------|----------|----------|-------|
| April 8  | 0.89     | -             | -        | -        | -        | -     |
| April 12 | 1.00     | 1.00          | -        | -        | -        | -     |
| April 18 | 0.01     | <b>8.5e-7</b> | 4.0e-4   | -        | -        | -     |
| April 26 | 1.8e-8   | 2.9e-13       | 5.5e-10  | 0.11     | -        | -     |
| May 8    | 3.0e-11  | 3.0e-16       | 7.6e-13  | 0.002    | 1.00     | -     |
| May 23   | 6.5e-13  | <2e-16        | 1.5e-14  | 1.0e-4   | 1.00     | 1.00  |

---

**Mean temperature**

---

**Date 2016**

|          | March 29 | April 5 | April 13 | April 18         | April 27 | May 4   | May 11  | May 19 | May 31 |
|----------|----------|---------|----------|------------------|----------|---------|---------|--------|--------|
| April 5  | <2e-16   | -       | -        | -                | -        | -       | -       | -      | -      |
| April 13 | 4.4e-7   | <2e-16  | -        | -                | -        | -       | -       | -      | -      |
| April 18 | 3.0e-12  | <2e-16  | <2e-16   | -                | -        | -       | -       | -      | -      |
| April 27 | 0.58     | <2e-16  | <2e-16   | <2e-16           | -        | -       | -       | -      | -      |
| May 4    | 1.00     | <2e-16  | 8.8e-16  | <b>&lt;2e-16</b> | 5.7e-5   | -       | -       | -      | -      |
| May 11   | 1.6e-5   | <2e-16  | <2e-16   | 3.2e-6           | 3.7e-5   | 2.7e-15 | -       | -      | -      |
| May 19   | 1.00     | <2e-16  | 8.8e-15  | <2e-16           | 7.0e-6   | 1.00    | 2.6e-16 | -      | -      |
| May 31   | 2.5e-16  | <2e-16  | <2e-16   | 0.03             | <2e-16   | <2e-16  | 3.0e-13 | <2e-16 | -      |
| June 30  | 7.5e-12  | <2e-16  | <2e-16   | 1.00             | <2e-16   | <2e-16  | 1.4e-5  | <2e-16 | 0.01   |

**Date 2017**

|          | March 29 | April 8        | April 12 | April 18 | April 26 | May 8   |
|----------|----------|----------------|----------|----------|----------|---------|
| April 8  | 2.4e-5   | -              | -        | -        | -        | -       |
| April 12 | 5.9e-16  | 1.0e-4         | -        | -        | -        | -       |
| April 18 | <2e-16   | <b>4.8e-13</b> | 0.003    | -        | -        | -       |
| April 26 | <2e-16   | 2.8e-13        | 0.002    | 1.00     | -        | -       |
| May 8    | 1.00     | 1.4e-5         | 2.9e-16  | <2e-16   | <2e-16   | -       |
| May 23   | 6.8e-12  | 0.07           | 1.00     | 2.7e-6   | 1.8e-6   | 3.4e-12 |

---

**Soil moisture**

---

**Date 2016**

|          | March 29 | April 5 | April 13 | April 18 | April 27 | May 4 | May 11 | May 19 | May 31 |
|----------|----------|---------|----------|----------|----------|-------|--------|--------|--------|
| April 5  | 1.00     | -       | -        | -        | -        | -     | -      | -      | -      |
| April 13 | 1.00     | 1.00    | -        | -        | -        | -     | -      | -      | -      |
| April 18 | 0.46     | 1.00    | 0.80     | -        | -        | -     | -      | -      | -      |
| April 27 | 1.00     | 1.00    | 1.00     | 0.47     | -        | -     | -      | -      | -      |

|         |        |      |       |             |        |        |        |        |      |
|---------|--------|------|-------|-------------|--------|--------|--------|--------|------|
| May 4   | 1.00   | 1.00 | 1.00  | <b>0.61</b> | 1.00   | -      | -      | -      | -    |
| May 11  | 1.00   | 0.55 | 1.00  | 0.07        | 1.00   | 1.00   | -      | -      | -    |
| May 19  | 1.00   | 0.38 | 1.00  | 0.05        | 1.00   | 1.00   | 1.00   | -      | -    |
| May 31  | 1.00   | 1.00 | 1.00  | 1.00        | 1.00   | 1.00   | 0.57   | 0.40   | -    |
| June 30 | 5.0e-4 | 0.32 | 0.001 | 1.00        | 7.0e-4 | 8.0e-4 | 4.7e-5 | 2.8e-5 | 0.31 |

**Date 2017**

|          | March 29 | April 8     | April 12 | April 18 | April 26 | May 8 |
|----------|----------|-------------|----------|----------|----------|-------|
| April 8  | 1.00     | -           | -        | -        | -        | -     |
| April 12 | 1.00     | 1.00        | -        | -        | -        | -     |
| April 18 | 1.00     | <b>1.00</b> | 1.00     | -        | -        | -     |
| April 26 | 1.00     | 1.00        | 1.00     | 1.00     | -        | -     |
| May 8    | 1.00     | 1.00        | 1.00     | 1.00     | 1.00     | -     |
| May 23   | 0.04     | 0.006       | 0.02     | 0.47     | 0.53     | 0.04  |

---
