# Supplementary material for: Environmental impact on the temporal production of chasmogamous and cleistogamous flowers in the mixed breeding system of Viola pubescens
Source: PubMed Central journal article supplement (PMC7065761; doi:10.1371/journal.pone.0229726), 2020-03-11
Supplement: pone.0229726.s006.pdf [file pone.0229726.s006.pdf]

|                                                        | <b>n<sup>2</sup></b> | <b>Minimum</b> | <b>Maximum</b> | <b>Mean</b> | <b>Std. Dev.</b> |
|--------------------------------------------------------|----------------------|----------------|----------------|-------------|------------------|
| <b>Variables 2016</b>                                  |                      |                |                |             |                  |
| Light quantity ( $\mu\text{mol m}^{-2}\text{s}^{-1}$ ) | 1,100                | 1.37           | 1,310          | 274.97      | $\pm 343.39$     |
| Canopy openness (%)                                    | 44                   | 2              | 44.19          | 19.86       | $\pm 14.83$      |
| Photoperiod (hours)                                    | 9                    | 12.83          | 14.88          | 13.93       | $\pm 0.67$       |
| Temperature ( $^{\circ}\text{C}$ )                     | 96,290               | -4             | 35.65          | 15.77       | $\pm 5.24$       |
| Soil moisture (%)                                      | 1,100                | 9.2            | 44             | 28.11       | $\pm 7.28$       |
| Soil pH                                                | 70                   | 5.12           | 6.70           | 5.84        | $\pm 0.44$       |
| <b>Variables 2017</b>                                  |                      |                |                |             |                  |
| Light quantity ( $\mu\text{mol m}^{-2}\text{s}^{-1}$ ) | 700                  | 3.78           | 1,430          | 333.86      | $\pm 347.34$     |
| Canopy openness (%)                                    | 21                   | 3.61           | 38.81          | 19.26       | $\pm 12.31$      |
| Photoperiod (hours)                                    | 7                    | 12.52          | 14.55          | 13.46       | $\pm 0.65$       |
| Temperature ( $^{\circ}\text{C}$ )                     | 18,578               | 0              | 31.5           | 14.87       | $\pm 4.12$       |
| Soil moisture (%)                                      | 700                  | 12             | 48             | 27.5        | $\pm 7.74$       |
| Soil pH                                                | 70                   | 4.66           | 6.38           | 5.55        | $\pm 0.44$       |
