# Supplementary material for: Environmental impact on the temporal production of chasmogamous and cleistogamous flowers in the mixed breeding system of Viola pubescens
Source: PubMed Central journal article supplement (PMC7065761; doi:10.1371/journal.pone.0229726), 2020-03-11
Supplement: pone.0229726.s007.pdf [file pone.0229726.s007.pdf]

---

**Vuong's non-nested test: Poisson vs zero-inflated Poisson**

---

| Chasmogamous Bud Data |                    |                      |                |
|-----------------------|--------------------|----------------------|----------------|
|                       | <i>z-statistic</i> | <i>H<sub>A</sub></i> | <i>p-value</i> |
| <i>Raw</i>            | -3.09              | model 2 > model 1    | 1.0e-3         |
| <i>AIC-corrected</i>  | -2.95              | model 2 > model 1    | 1.6e-3         |
| <i>BIC-corrected</i>  | -2.74              | model 2 > model 1    | 3.1e-3         |

| Cleistogamous Bud Data |                    |                      |                |
|------------------------|--------------------|----------------------|----------------|
|                        | <i>z-statistic</i> | <i>H<sub>A</sub></i> | <i>p-value</i> |
| <i>Raw</i>             | -4.51              | model 2 > model 1    | 3.27e-6        |
| <i>AIC-corrected</i>   | -4.44              | model 2 > model 1    | 4.40e-6        |
| <i>BIC-corrected</i>   | -4.34              | model 2 > model 1    | 6.89e-6        |

---

**Vuong's non-nested test: Negative binomial vs zero-inflated negative binomial**

---

| Chasmogamous Bud Data |                    |                      |                |
|-----------------------|--------------------|----------------------|----------------|
|                       | <i>z-statistic</i> | <i>H<sub>A</sub></i> | <i>p-value</i> |
| <i>Raw</i>            | -4.70              | model 2 > model 1    | 1.31e-6        |
| <i>AIC-corrected</i>  | -4.01              | model 2 > model 1    | 3.09e-5        |
| <i>BIC-corrected</i>  | -2.94              | model 2 > model 1    | 1.6e-3         |

| Cleistogamous Bud Data |                    |                      |                |
|------------------------|--------------------|----------------------|----------------|
|                        | <i>z-statistic</i> | <i>H<sub>A</sub></i> | <i>p-value</i> |
| <i>Raw</i>             | -7.50              | model 2 > model 1    | 3.26e-14       |
| <i>AIC-corrected</i>   | -6.68              | model 2 > model 1    | 1.22e-11       |
| <i>BIC-corrected</i>   | -5.42              | model 2 > model 1    | 3.05e-8        |

---

**Likelihood ratio test: Zero-inflated Poisson vs zero-inflated negative binomial**

---

| Chasmogamous Bud Data                  |                       |                    |                |
|----------------------------------------|-----------------------|--------------------|----------------|
|                                        | <i>Log-likelihood</i> | <i>Chi-squared</i> | <i>p-value</i> |
| <i>Zero-inflated Poisson</i>           | -316.78               | -                  | -              |
| <i>Zero-inflated negative binomial</i> | -230.30               | 172.96             | <2.2e-16       |

| Cleistogamous Bud Data                 |                       |                    |                |
|----------------------------------------|-----------------------|--------------------|----------------|
|                                        | <i>Log-likelihood</i> | <i>Chi-squared</i> | <i>p-value</i> |
| <i>Zero-inflated Poisson</i>           | -451.76               | -                  | -              |
| <i>Zero-inflated negative binomial</i> | -287.47               | 328.57             | <2.2e-16       |

---

**Akaike information criterion: All vs all**

---

|                                        | Chasmogamous Data <i>AIC</i> | Cleistogamous Data <i>AIC</i> |
|----------------------------------------|------------------------------|-------------------------------|
| <i>Poisson</i>                         | 913.46                       | 1768.74                       |
| <i>Negative binomial</i>               | 555.96                       | 698.63                        |
| <i>Zero-inflated Poisson</i>           | 657.56                       | 927.52                        |
| <i>Zero-inflated negative binomial</i> | 486.60                       | 600.94                        |

---
